# Supplementary material for: Enhanced ammonia synthesis performance of a ceria-supported bimetallic catalyst by changing Co and Mo segregation
Source: Royal Society of Chemistry journal article supplement (doi:10.1039/d2cy01174c), 2022-01-01
Supplement: d2cy01174c1.pdf [file d2cy01174c1.pdf]

## Enhanced ammonia synthesis performance of ceria-supported bimetallic catalyst by changing Co and Mo segregation

Biyun Fang, Jiahui Li, Fangming Liu, Chuanfeng Zhang, Chunyan Li, Jun Ni, Jianxin Lin,  
Bingyu Lin\*, and Lilong Jiang\*

National Engineering Research Center of Chemical Fertilizer Catalyst, College of Chemical  
Engineering, Fuzhou University, Fuzhou, 350002 Fujian, China. E-mail: bylin@fzu.edu.cn  
(Bingyu Lin), jll@fzu.edu.cn (Lilong Jiang).

## Characterization

XRD analysis was performed on a PANalytical X'Pert3 powder diffractometer with Cu K $\alpha$  radiation. The texture of catalysts was obtained by Micromeritics ASAP 2020 apparatus at  $-196$  °C. Transmission electron microscopy (TEM) and high-angle annular dark-field scanning transmission electron microscopy (HAADF-STEM) images were obtained by a FEI Tecnai G2 F30 microscope. Aberration-corrected HAADF-STEM images were measured by a FEI Tian G2 60-300 microscope. Raman spectra of samples were acquired on an InVia Reflex Raman microscope equipped with a 532 nm laser.

X-ray photoelectron spectroscopy (XPS) spectrum of catalysts was collected on an ESCALAB 250Xi photoelectron spectrometer. Specifically, Sample was reduced at  $500$  °C for 6 h in 75% $H_2$ /25% $N_2$  mixture in a pretreatment chamber attached to the spectrometer. Then, the C1s peak of adventitious carbon was regulated to the binding energy at 284.6 eV.

Hydrogen temperature-programmed reduction ( $H_2$ -TPR) of sample was performed on a Micromeritics AutoChem II 2920. 100 mg of catalyst was purged in Ar at  $150$  °C for 1 h and then cooled to  $50$  °C. Afterward, the sample was heated from  $50$  °C to  $600$  °C in 10%  $H_2$ /Ar mixture. Temperature-programmed desorption of hydrogen experiments ( $H_2$ -TPD) and Temperature-programmed desorption of nitrogen experiments ( $N_2$ -TPD) were carried out on the same instrument. After reduced in  $H_2$  at  $500$  °C for 6 h, catalyst was purged and cooled to  $400$  °C in Ar. Then hydrogen or nitrogen was added to sample for 1 h and cooled to  $50$  °C. Afterwards, the sample was heated in Ar flow to  $600$  °C, and the mass signals were obtained.

### Calculations of ammonia synthesis rate:

The ammonia synthesis rate is calculated by the concentration of ammonium ion, which is examined using an ion chromatography (Thermo Scientific, ICS-600) equipped with the Dionex IonPac<sup>TM</sup>CS16 column and DS5 conductivity detector. The ammonia synthesis rate is calculated by the following formula:

$$r = \frac{C * V * 3600}{T * M_N * m_{cat}}$$

r: ammonia synthesis rate (mol g<sup>-1</sup> h<sup>-1</sup>);

C: concentration of ammonium ion (mg L<sup>-1</sup>);

V: liquid volume in gas absorption tube (mL);

T: absorption time (s);

M<sub>N</sub>: relative atomic mass of nitrogen atom (14);

m<sub>cat</sub>: quality of the catalyst (g).

## Mass and Heat Transfer Calculations for Ammonia Synthesis over Mo/Co-C

Mears Criterion for External Diffusion (Fogler, Elements of Chemical Reaction Engineering, 4th

edition, p841; Mears, Ind. Eng. Chem. Process Des. Dev. 1971, 10, 541–547)

$$\text{If } C_M = \frac{(-r'_A)\rho_b R n}{k_c C_{Ab}} < 0.15, \text{ then external mass transfer effects can be neglected.}$$

$-r'_A$  = reaction rate of nitrogen, kmol/kg-cat·s

n = reaction order with respect to N<sub>2</sub>.

R = catalyst particle radius, m

$\rho_b$  = bulk density of catalyst bed, kg/m<sup>3</sup>

$C_{Ab}$  = bulk gas concentration of nitrogen, kmol/m<sup>3</sup>

$k_c$  = mass transfer coefficient, m/s

$$C_M = \frac{(-r'_A)\rho_b R n}{k_c C_{Ab}} = [2.2 \times 10^{-7} \text{ kmol-N}_2/\text{kg-cat}\cdot\text{s}][910 \text{ kg/m}^3][3 \times 10^{-4} \text{ m}][0.69]/([1.7 \text{ m/s}][0.045 \text{ kmol/m}^3]) = 5.4 \times 10^{-7} < 0.15$$

Generally, according to the Mears Criterion, when the calculation value for  $C_M$  is below 0.15, the external diffusion limitations can be neglected during the kinetic experiments. In our case, the  $C_M$  is  $5.4 \times 10^{-7}$ , indicating that the external diffusion limitations of the kinetic experiments could be neglected.

Weisz-Prater Criterion for Internal Diffusion (Fogler, Elements of Chemical Reaction Engineering, 4th edition, p839)

$$\text{If } C_{WP} = \frac{(-r'_A)\rho_c R^2}{D_e C_{As}} < 1, \text{ then internal mass transfer effects can be neglected.}$$

$-r'_A$  = reaction rate of nitrogen, kmol/(kg-cat·s)

$\rho_c$  = solid catalyst density (kg m<sup>-3</sup>)

R = catalyst particle radius, m

$\rho_c$  = bulk density of catalyst bed, kg/m<sup>3</sup>

$C_{Ab}$  = bulk gas concentration of nitrogen, kmol/m<sup>3</sup>

$k_c$  = mass transfer coefficient, m/s

$D_e$  = effective gas-phase diffusivity (m<sup>2</sup> s<sup>-1</sup>)

$$C_{WP} = \frac{(-r'_A)\rho_c R^2}{D_e C_{As}} = [2.2 \times 10^{-7} \text{ kmol-N}_2/\text{kg-cat}\cdot\text{s}] \times [4 \times 10^3 \text{ kg-cat/m}^3] \times [3 \times 10^{-4} \text{ m}]^2 / ([3.34 \times 10^{-6} \text{ m}^2/\text{s}] \times [0.045 \text{ kmol/m}^3]) = \mathbf{5.3 \times 10^{-4} < 1}$$

Generally, according to the Mears Criterion, when the calculation value for  $C_{WP}$  is below 1, the internal diffusion limitations can be neglected during the kinetic experiments. In our case, the  $C_{WP}$  is  $\mathbf{5.3 \times 10^{-4} < 1}$ , indicating that the internal diffusion limitations of the kinetic experiments could be neglected.

Mears Criterion for External (Interphase) Heat Transfer (Fogler, Elements of Chemical Reaction Engineering, 4th edition, p842)

$$C_{MH} = \left| \frac{-\Delta H_r (-r'_A) \rho_b R E}{h_t T_b^2 R_g} \right| < 0.15$$

$$[136.9 \text{ kJ/mol} \times 2.2 \times 10^{-7} \text{ kmol-N}_2/\text{kg-cat}\cdot\text{s} \times 910 \text{ kg-cat/m}^3 \times 3 \times 10^{-4} \text{ m} \times 150 \text{ kJ/mol}] / [185.3 \text{ kJ/m}^2\cdot\text{K}\cdot\text{s} \times 673^2 \text{ K}^2 \times 8.314 \times 10^{-3} \text{ kJ/mol}\cdot\text{K}] = \mathbf{9.4 \times 10^{-6} < 0.15}$$

Generally, according to the Mears Criterion, when the calculation value for  $C_{MH}$  is below 0.15, the heat transfer effect can be neglected during the kinetic experiments. In our case, the  $C_{MH}$  is  $\mathbf{9.4 \times 10^{-6}}$ , indicating that the heat transfer effect can be neglected in the kinetic experiments.

Mears Criterion for Combined Interphase and Intraparticle Heat and Mass Transport (Mears, Ind.

Eng. Chem. Process Des. Dev. 1971, 10, 541–547)

$$\frac{(-r'_A)\rho_b R^2}{D_e C_{Ab}} < \frac{1 + 0.33\gamma\chi}{|n - r_b\beta_b|(1 + 0.33n\omega)}$$

$$\gamma = \frac{E}{R_g T_s}; \gamma_b = \frac{E}{R_g T_b}; \beta_b = \frac{(-\Delta H_r) D_e C_{Ab}}{\lambda T_b}; \chi = \frac{(-\Delta H_r)(-r'_A)R}{h_t T_b}; \omega = \frac{(-r'_A)R}{k_c C_{Ab}}$$

$\gamma$  = Arrhenius number;

$\beta_b$  = heat generation function;

$\lambda$  = catalyst thermal conductivity, W/m.K;

$\chi$  = Damköhler number for interphase heat transport

$\omega$  = Damköhler number for interphase mass transport

$$\frac{(-r'_A)\rho_b R^2}{D_e C_{Ab}} = [2.2 \times 10^{-7} \text{ kmol-N}_2/\text{kg-cat}\cdot\text{s} \times 910 \text{ kg-cat/m}^3 \times (3 \times 10^{-4})^2 \text{ m}^2] / ([3.34 \times 10^{-6} \text{ m}^2/\text{s}] \times$$

$$[0.045 \text{ kmol/m}^3]) = \mathbf{12.0 \times 10^{-5}}$$

$$\frac{1 + 0.33\gamma\chi}{|n - r_b\beta_b|(1 + 0.33n\omega)} = \mathbf{1.1}$$

Left member < Right member

Generally, according to the Mears Criterion, when the calculation value for  $\frac{(-r'_A)\rho_b R^2}{D_e C_{Ab}}$  is lower

than that for  $\frac{1 + 0.33\gamma\chi}{|n - r_b\beta_b|(1 + 0.33n\omega)}$ , the interphase and intraparticle heat and mass transfer effect can be neglected during the kinetic experiments.

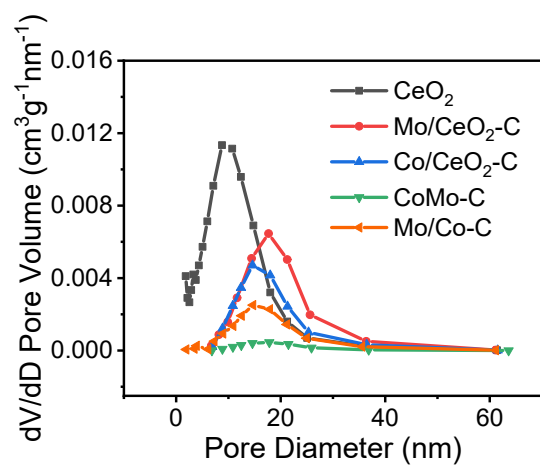

Fig. S1 Pore size distribution curves of samples.

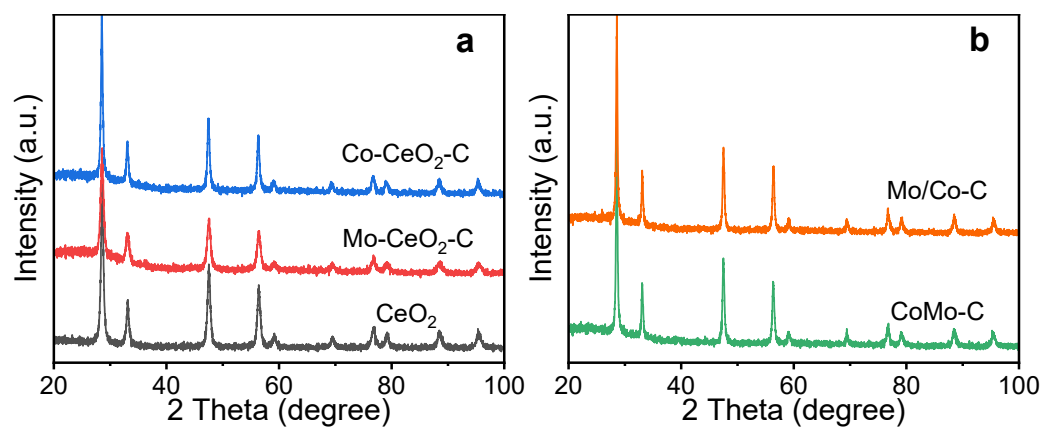

Fig. S2 XRD pattern of various samples.

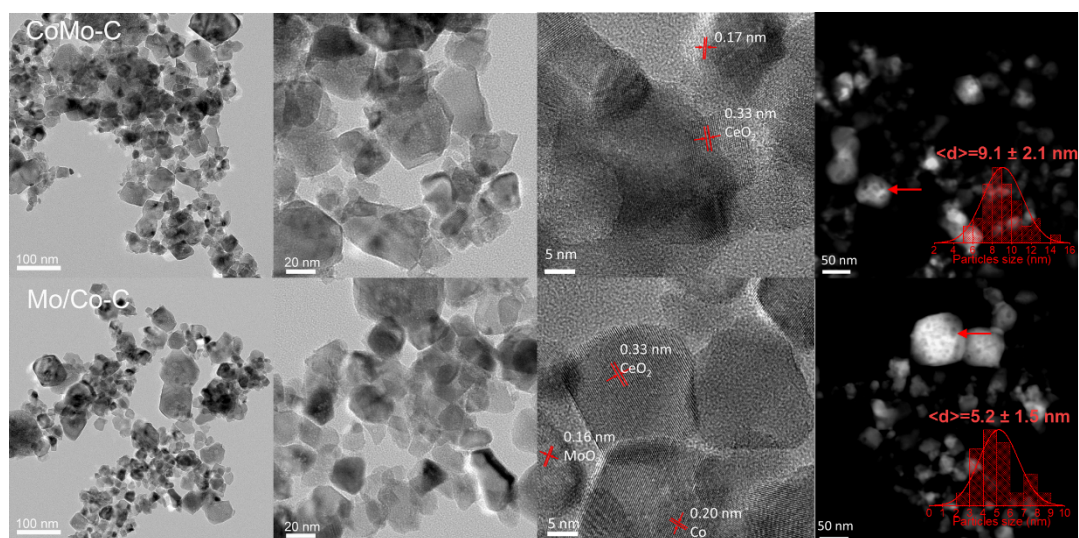

Fig. S3 TEM images and Co-Mo particle size distribution in the inset.

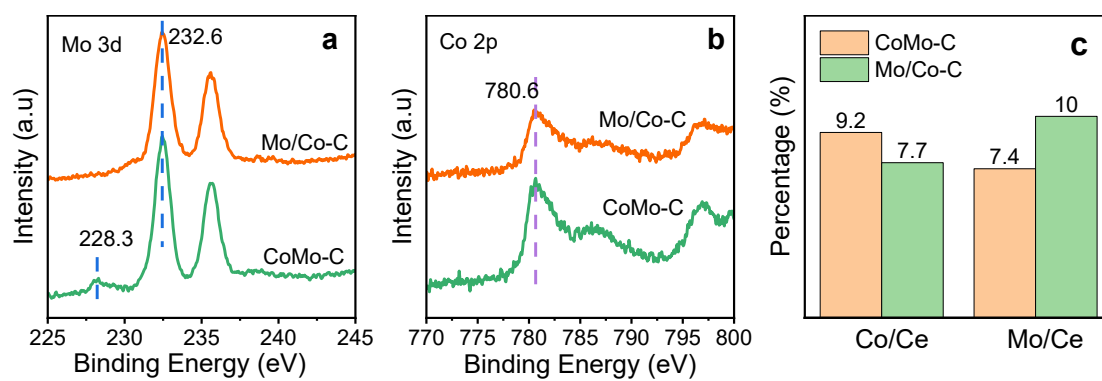

Fig. S4 XPS spectra of the as-prepared samples: (a) Mo 3d, (b) Co 2p and (c) the percentage of Co/Ce and Mo/Ce.

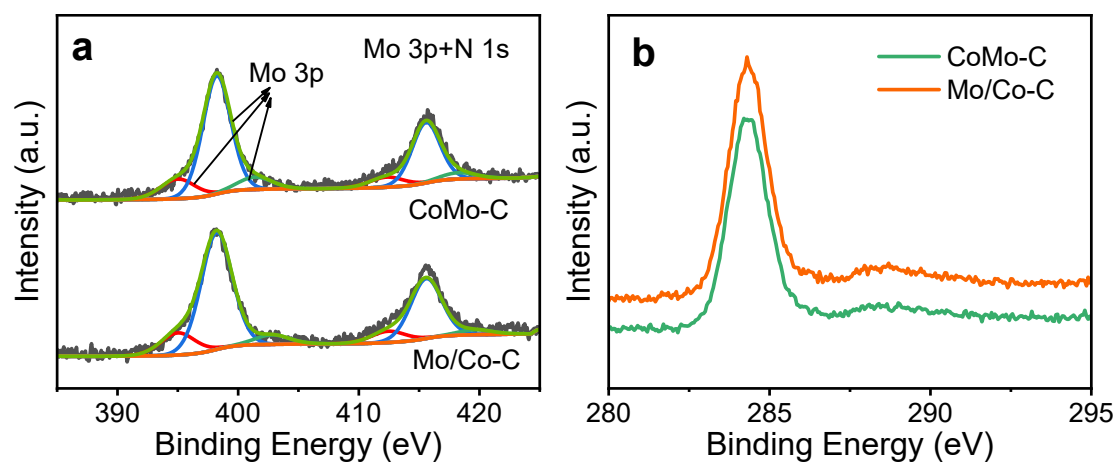

Fig. S5 XPS spectra of the as-prepared samples: (a) Mo 3p+N 1s, (b) C 1s.

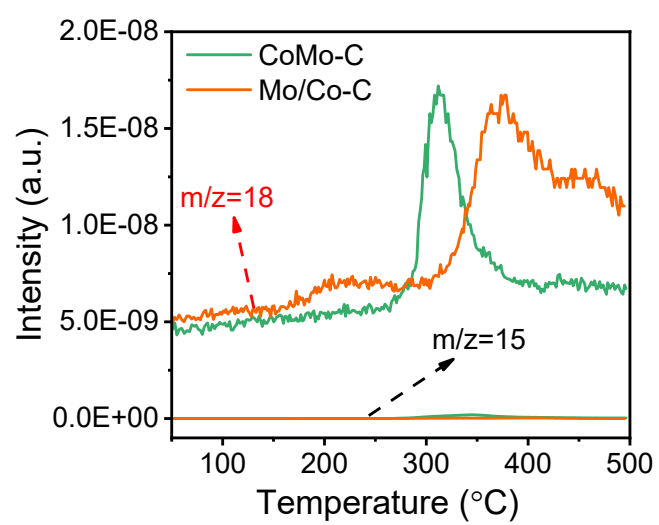

Fig. S6 MS signals of  $m/z=18$  and  $m/z=15$  during H<sub>2</sub>-TPR.

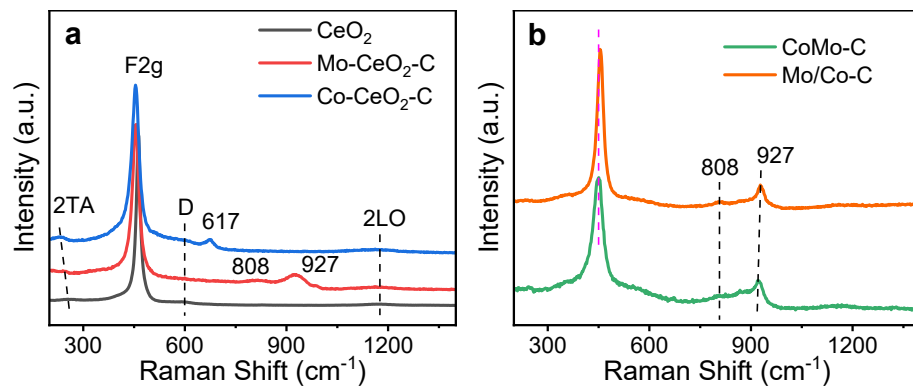

Fig. S7 Raman spectra of various samples.

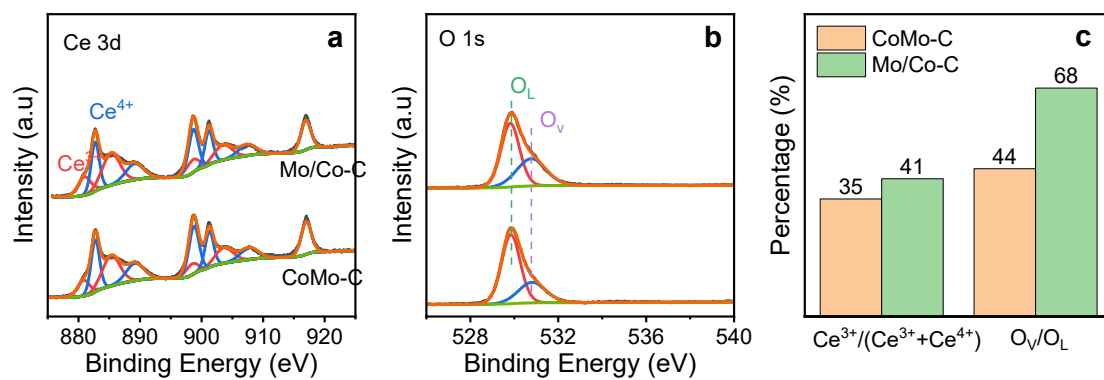

Fig. S8 XPS spectra of the reduced catalysts: (a) Ce 3d, (b) O 1s and (c) the ratios of  $Ce^{3+}/(Ce^{3+}+Ce^{4+})$  and  $O_V/O_L$ .

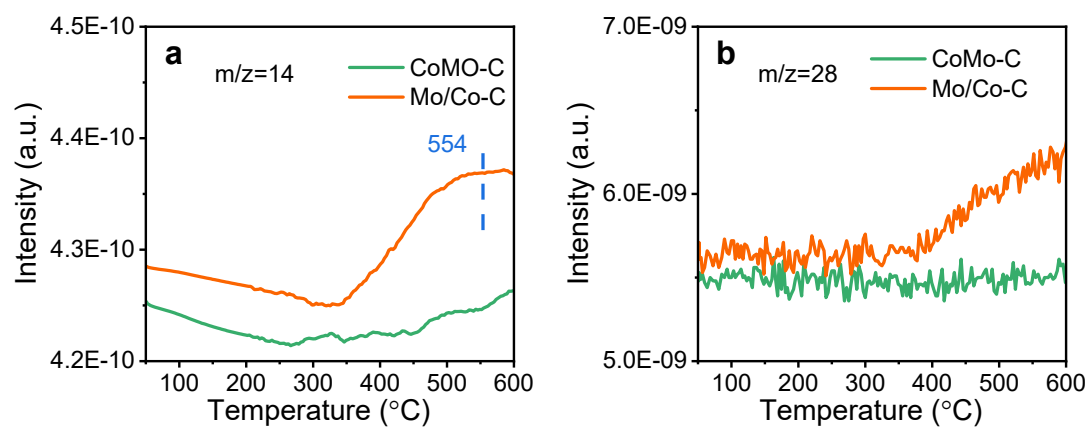

Fig. S9 MS signals of (a)  $m/z=14$  and (b)  $m/z=28$  during N<sub>2</sub>-TPD.

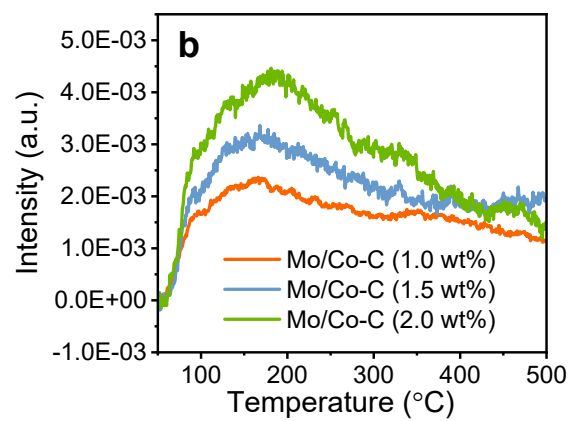

Fig. S10 H<sub>2</sub>-TPD profile over catalysts with different Co loadings.

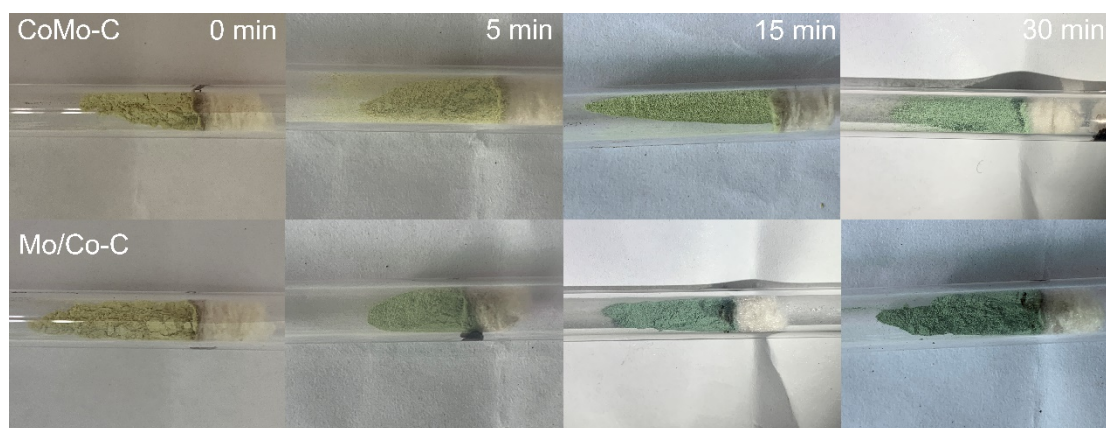

Fig. S11 **Color change photographs of the mixtures.** Photographs of samples made with  $\text{WO}_3$  mixed with the catalysts before treatment (0 min) and after treatment with  $\text{H}_2$  at  $300^\circ\text{C}$  for 5 min, 15 min and 30 min.

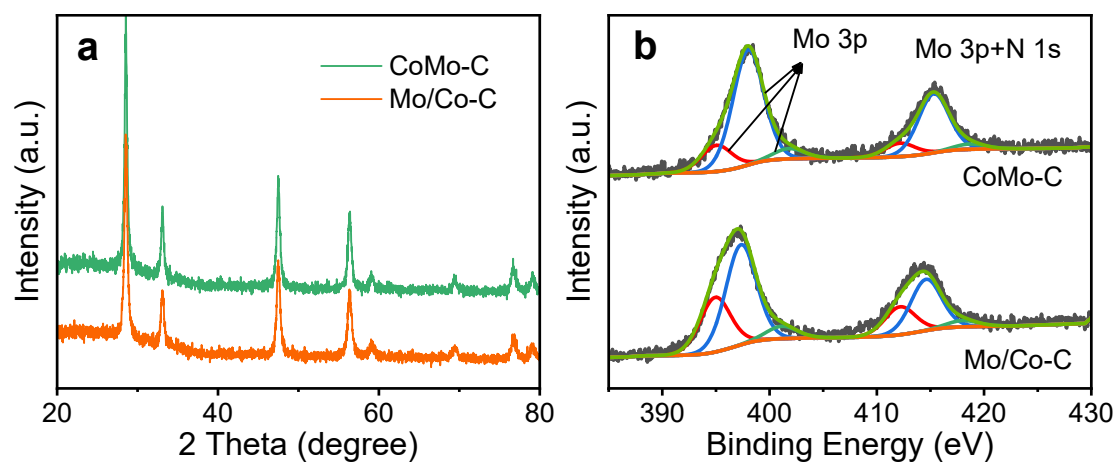

Fig S12 XRD pattern of used catalysts and Mo 3p+N 1s spectrum of catalysts with treatment in  $N_2-H_2$  mixture.

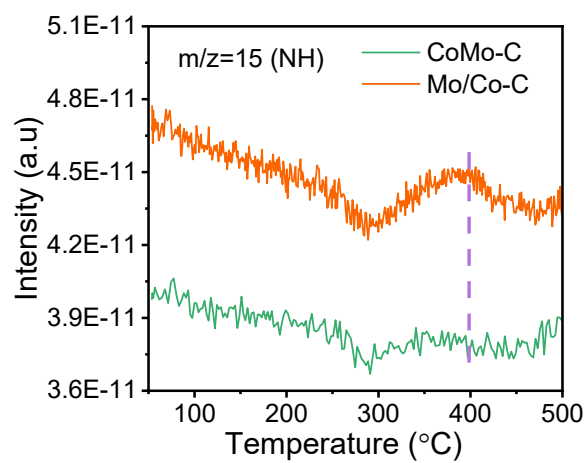

Fig. S13 MS signals of a  $m/z=15$  (NH) during TPSR over catalysts pre-adsorbed with  $\text{D}_2$ .

**Table S1** Catalytic performance of various Co-Mo catalysts.

| Samples                | Rate                                     | Ea                       | Reaction        | SV                                   | Ref. |
|------------------------|------------------------------------------|--------------------------|-----------------|--------------------------------------|------|
|                        | ( $\mu\text{mol g}^{-1} \text{h}^{-1}$ ) | ( $\text{kJ mol}^{-1}$ ) | conditions      | ( $\text{mL g}^{-1} \text{h}^{-1}$ ) |      |
| CoMo-C                 | 909                                      | 88                       | 1 MPa, 400 °C   | 36000                                | This |
| Mo/Co-C                | 1563                                     | 56                       | 1 MPa, 400 °C   | 36000                                | work |
| Mo/Co-C (0.5wt%)       | 1026                                     | 53                       | 1 MPa, 400 °C   | 36000                                | This |
| Mo/Co-C (1.5wt%)       | 1525                                     | 58                       | 1 MPa, 400 °C   | 36000                                | work |
| Mo/Co-C (2.0wt%)       | 1558                                     | 55                       | 1 MPa, 400 °C   | 36000                                | This |
| Mo/Co-C (2.5wt%)       | 1653                                     | 55                       | 1 MPa, 400 °C   | 36000                                | Work |
| Mo (8.3wt%)/Co-C       | 1597                                     | -                        | 1 MPa, 400 °C   | 36000                                | This |
| Mo (10.9wt%)/Co-C      | 1625                                     | -                        | 1 MPa, 400 °C   | 36000                                | Work |
| CoMo <sub>T</sub> -c   | 895                                      | -                        | 1 MPa, 400 °C   | 36000                                | This |
| Mo <sub>T</sub> /Co-C  | 1605                                     | -                        | 1 MPa, 400 °C   | 36000                                | work |
| CoMo-C                 | 1545                                     | -                        | 1 MPa, 400 °C   | 72000                                | This |
| Mo/Co-C                | 3282                                     | -                        | 1 MPa, 400 °C   | 72000                                | work |
| Mo/Co-H                | 1288                                     | 57                       | 1 MPa, 400 °C   | 36000                                | 1    |
| Co/CeO <sub>2</sub>    | 689                                      | -                        | 1 MPa, 400 °C   | 36000                                | 1    |
| Mo/CeO <sub>2</sub>    | 203                                      | -                        | 1 MPa, 400 °C   | 36000                                | 1    |
| CoMo/CeO <sub>2</sub>  | 481                                      | 61                       | 1 MPa, 400 °C   | 36000                                | 1    |
| Co-Mo/CeO <sub>2</sub> | 2840                                     | 61                       | 0.9 MPa, 400 °C | 72000                                | 2-3  |

**Table S2** Textural properties of CeO<sub>2</sub> and CeO<sub>2</sub> supported Co-Mo catalysts.

| Samples                | Surface area                      | Pore volume                        | Average pore size | Co    | Mo    |
|------------------------|-----------------------------------|------------------------------------|-------------------|-------|-------|
|                        | (m <sup>2</sup> g <sup>-1</sup> ) | (cm <sup>3</sup> g <sup>-1</sup> ) | (nm)              | (wt%) | (wt%) |
| CeO <sub>2</sub>       | 45                                | 0.15                               | 9                 | -     | -     |
| Mo/CeO <sub>2</sub> -C | 16                                | 0.10                               | 19                | -     | 5.46  |
| Co/CeO <sub>2</sub> -C | 13                                | 0.07                               | 18                | 0.95  | -     |
| CoMo-C                 | 1                                 | 0.01                               | 19                | 1.01  | 5.56  |
| Mo/Co-C                | 12                                | 0.04                               | 13                | 0.96  | 5.72  |

## References

1. Fang, B.; Qi, Z.; Liu, F.; Zhang, C.; Li, C.; Ni, J.; Lin, J.; Lin, B.; Jiang, L., Activity enhancement of ceria-supported Co-Mo bimetallic catalysts by tuning reducibility and metal enrichment. *J. Catal.* **2022**, *406*, 231-240.
2. Tsuji, Y.; Kitano, M.; Kishida, K.; Sasase, M.; Yokoyama, T.; Hara, M.; Hosono, H., Ammonia synthesis over Co-Mo alloy nanoparticle catalyst prepared via sodium naphthalenide-driven reduction. *Chem Commun (Camb)* **2016**, *52* (100), 14369-14372.
3. Tsuji, Y.; Ogasawara, K.; Kitano, M.; Kishida, K.; Abe, H.; Niwa, Y.; Yokoyama, T.; Hara, M.; Hosono, H., Control of nitrogen activation ability by Co-Mo bimetallic nanoparticle catalysts prepared via sodium naphthalenide-reduction. *J. Catal.* **2018**, *364*, 31-39.
